# Supplementary material
Source: Springer Nature journal article supplement (https://www.springermedizin.de/resource/supplementary/12879_2009_894_MOESM6_ESM.pdf/9449584)

# Impact of vaccination on the attack rate

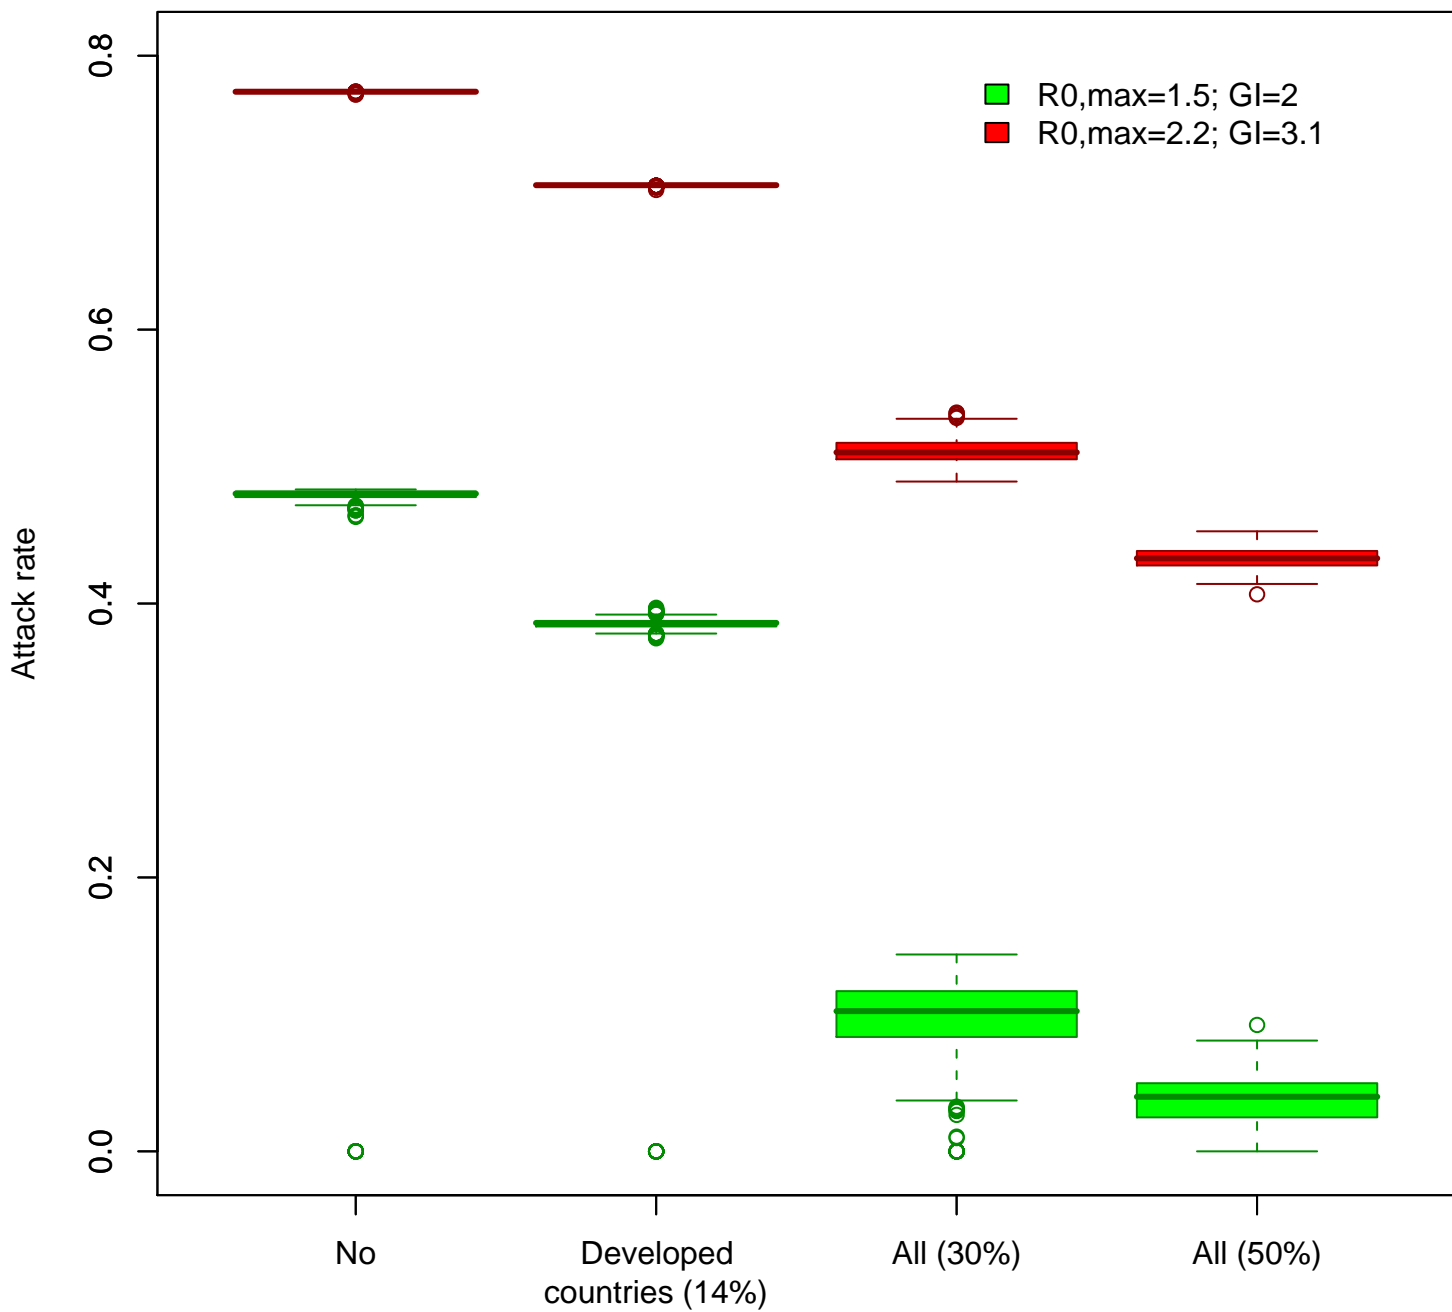

Supplement: MOESM6 [file 9449584]
